# Supplementary material
Source: publisher figshare collection journal article supplement (https://frontiersin.figshare.com/ndownloader/files/17291765)
Supplement: Supplementary file [file 17291765]

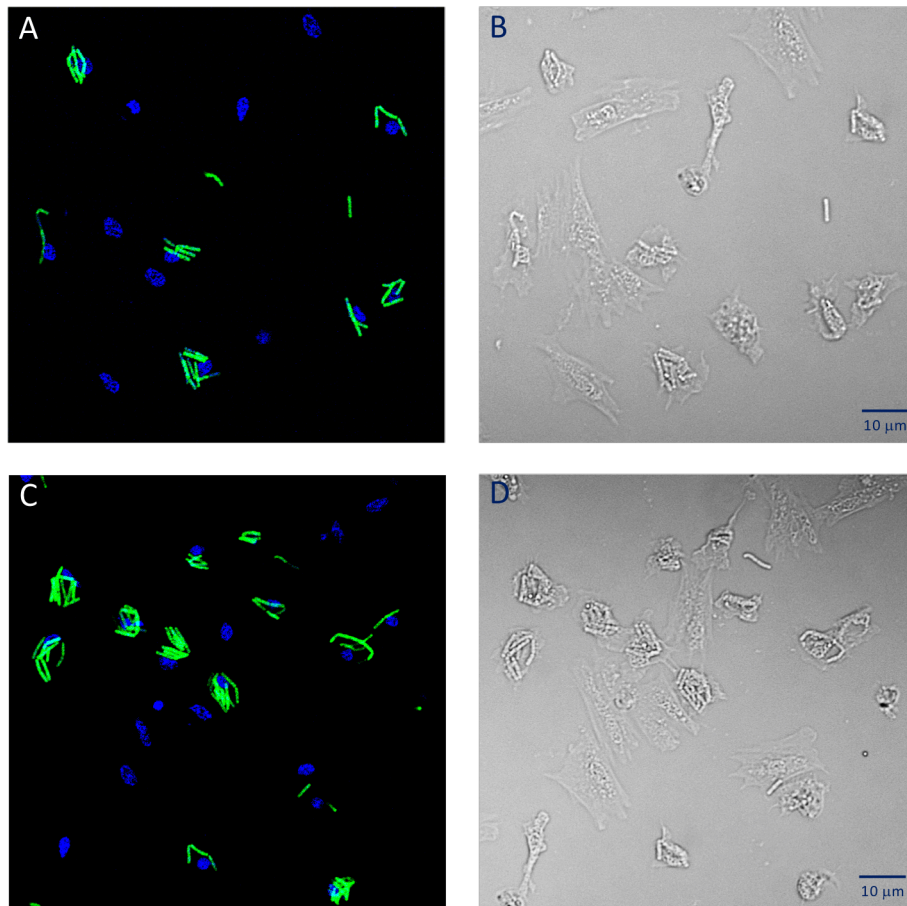

**Supplementary Figure 1. Phagocytosis by *C. robusta* haemocytes.**

Phagocytosis was performed *in vitro* by exposing *C. robusta* haemocytes to fluorescent *B. cereus* bacteria for 1 h at 18°C.

Panels A and B: haemocytes from control animals phagocytosing fluorescent bacteria.

Panels C and D: haemocytes from LPS-treated animals phagocytosing fluorescent bacteria.

Panels A and C: dark field, panels B and D: white field.

Haemocyte nuclei were labelled with the nucleic acid dye DAPI (blue colour), bacteria were labelled with FITC (green colour). Scale bar 10 μm.

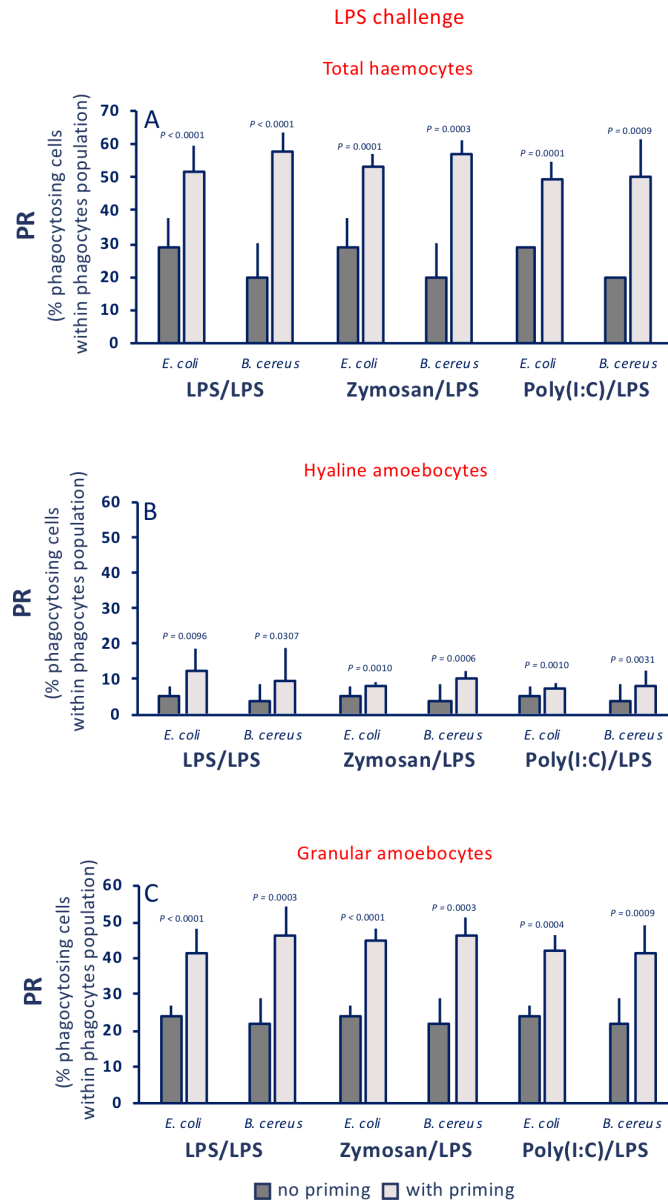

**Supplementary Figure 2. Innate memory-induced variations in the phagocytic rate of *C. robusta* haemocytes challenged *in vivo* with LPS.**

The phagocytic rate (PR), *i.e.*, the percentage of phagocytosing cells within the phagocyte population in haemolymph, was assessed 24 h after primary exposure to LPS, Zymosan or Poly(I:C) (dark grey columns, no priming), and after a 24-h LPS challenge of primed animals (light grey columns, with priming).

Panel A: PR of the total haemocyte population for two bacterial strains, the gram-negative *E. coli*, and the gram-positive *B. cereus*. The PR of control animals receiving MS once or twice (controls) was  $17.9 \pm 3.7\%$  for *E. coli*, and  $22.4 \pm 1.8\%$  for *B. cereus*. The mean values  $\pm$  SD of 5 animals are reported.

Panel B: PR of hyaline cells, *i.e.*, one of the two phagocytic amoebocyte subpopulations. The PR of control hyaline cells (from animals receiving MS once or twice) was  $1.5 \pm 1.1$  for *E. coli* and  $3.5 \pm 0.4$  for *B. cereus*.

Panel C: PR of granular cells, *i.e.*, the other phagocytic amoebocyte subpopulation. The PR of granular cells (from animals receiving MS once or twice) was  $16.5 \pm 1.8$  for *E. coli* and  $19.0 \pm 0.9$  for *B. cereus*.

The mean values  $\pm$  SD of 5 animals for each treatment are reported.

The data for the LPS/LPS combinations are the same reported in the Figure 3 and are repeated here for comparison.

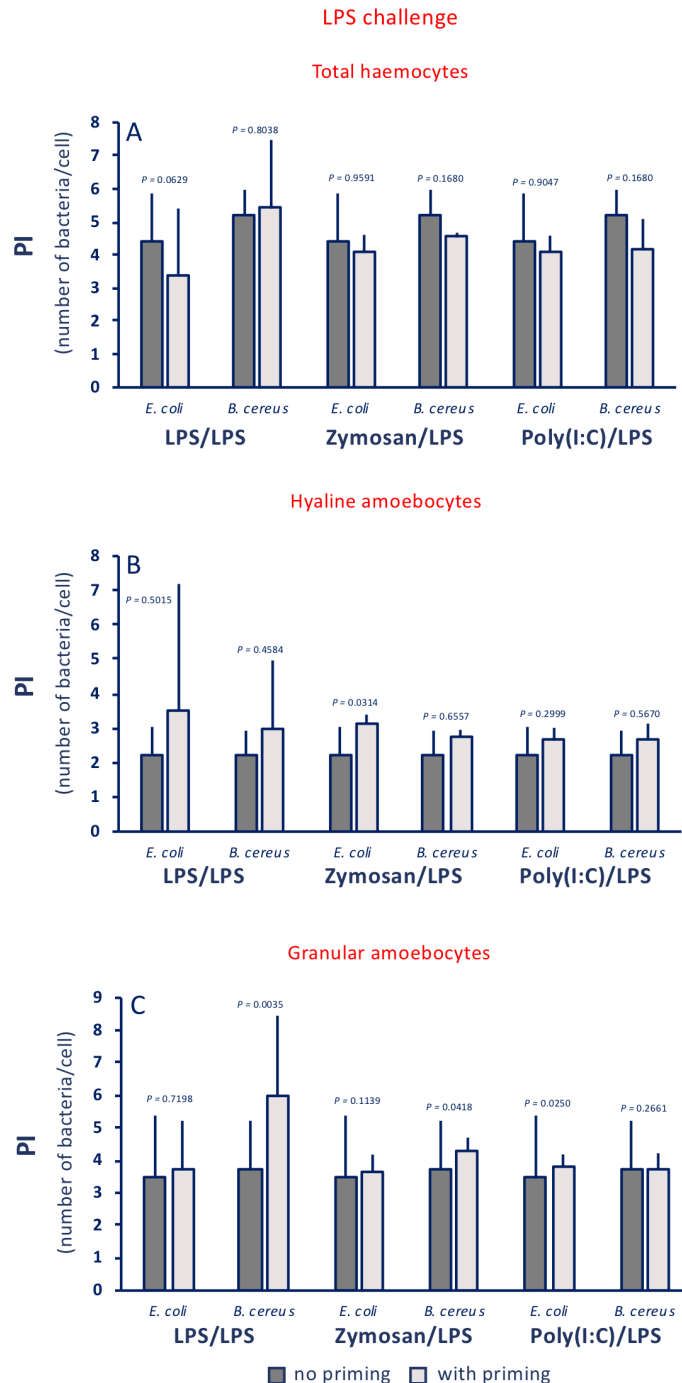

**Supplementary Figure 3. Innate memory-induced variations in the phagocytic index of *C. robusta* haemocytes challenged *in vivo* with LPS.** The phagocytic index (PI), *i.e.*, the number of bacteria ingested by single phagocytes in haemolymph, was assessed 24 h after primary exposure to LPS, Zymosan or Poly(I:C) (dark grey columns, no priming), and after a 24-h LPS challenge of primed animals (light grey columns, with priming). Panel A: PI of the total haemocyte population for two bacterial strains, the gram-negative *E. coli*, and the gram-positive *B. cereus*. The PI of haemocytes from control animals receiving MS once or twice (controls) was  $17.9 \pm 3.7\%$  for *E. coli*, and  $22.4 \pm 1.8\%$  for *B. cereus*. The mean values  $\pm$  SD of 5 animals are reported. Panel B: PI of hyaline cells, *i.e.*, one of the two phagocytic amoebocyte subpopulations. The PI of control hyaline cells  $0.9 \pm 0.4$  for *E. coli* and  $1.5 \pm 0.7$  for *B. cereus*. Panel C: PI of granular cells, *i.e.*, the other phagocytic amoebocyte subpopulation. The PI of control granular cells was  $3.0 \pm 1.1$  for *E. coli* and  $3.4 \pm 0.9$  for *B. cereus*. The mean values  $\pm$  SD of 5 animals for each treatment are reported. The data for the LPS/LPS combinations are the same reported in the Figure 4 and are repeated here for comparison.

**Supplementary Table 1. Priming-dependent variations of gene expression levels in primed/challenged *C. robusta***

| <i>Gene</i>   | <b>Priming-dependent changes in the response to any challenge</b> |                                      |                                 |
|---------------|-------------------------------------------------------------------|--------------------------------------|---------------------------------|
|               | <i>LPS priming-dependent changes</i>                              | <i>LTA priming-dependent changes</i> | <i>Common priming changes</i>   |
| <i>C3-1</i>   | -                                                                 | Up<br>(above bkg)                    | -                               |
| <i>C3ar</i>   | -                                                                 | -                                    | -                               |
| <i>Il17-2</i> | -                                                                 | Up<br>(above bkg)                    | -                               |
| <i>Il17r</i>  | -                                                                 | -                                    | -                               |
| <i>Tnf</i>    | -                                                                 | -                                    | Up<br>(above bkg or normalised) |
| <i>Tgfb</i>   | -                                                                 | -                                    | -                               |
| <i>Lbp</i>    | -                                                                 | -                                    | Up<br>(above bkg)               |
| <i>Tlr-2</i>  | -                                                                 | -                                    | -                               |
| <i>Tlr13</i>  | -                                                                 | -                                    | -                               |
| <i>Cd36</i>   | -                                                                 | -                                    | -                               |

**Supplementary Table 2. Challenge-dependent variations of gene expression levels in primed/challenged *C. robusta***

| <i>Gene</i>   | <b>Challenge-dependent changes in the response to any priming</b> |                                        |                                 |
|---------------|-------------------------------------------------------------------|----------------------------------------|---------------------------------|
|               | <i>LPS challenge-dependent changes</i>                            | <i>LTA challenge-dependent changes</i> | <i>Common challenge changes</i> |
| <i>C3-1</i>   | -                                                                 | Up<br>(above bkg)                      | -                               |
| <i>C3ar</i>   | Down<br>(below bkg)                                               | Up<br>(above bkg)                      | -                               |
| <i>Il17-2</i> | -                                                                 | Up<br>(above bkg)                      | -                               |
| <i>Il17r</i>  | Up<br>(normalised)                                                | -                                      | -                               |
| <i>Tnf</i>    | -                                                                 | -                                      | Up<br>(above bkg or normalised) |
| <i>Tgfb</i>   | -                                                                 | -                                      | -                               |
| <i>Lbp</i>    | -                                                                 | -                                      | Up<br>(above bkg or normalised) |
| <i>Tlr-2</i>  | -                                                                 | -                                      | -                               |
| <i>Tlr13</i>  | Up<br>(above bkg)                                                 | -                                      | -                               |
| <i>Cd36</i>   | Up<br>(above bkg)                                                 | -                                      | -                               |

**Supplementary Table 3. Priming/challenge-specific variations of gene expression levels in primed/challenged *C. robusta***

| <b>Gene</b>   | <b>Priming-dependent changes in the response to individual challenges</b> |                                                    |                                                    |                                                    |
|---------------|---------------------------------------------------------------------------|----------------------------------------------------|----------------------------------------------------|----------------------------------------------------|
|               | <i>LPS priming/LPS challenge-dependent changes</i>                        | <i>LTA priming/LTA challenge-dependent changes</i> | <i>LPS priming/LTA challenge-dependent changes</i> | <i>LTA priming/LPS challenge-dependent changes</i> |
| <i>C3-1</i>   | none                                                                      | -                                                  | -                                                  | -                                                  |
| <i>C3ar</i>   | -                                                                         | -                                                  | -                                                  | -                                                  |
| <i>Il17-2</i> | none                                                                      | -                                                  | -                                                  | -                                                  |
| <i>Il17r</i>  | -                                                                         | -                                                  | -                                                  | -                                                  |
| <i>Tnf</i>    | -                                                                         | -                                                  | -                                                  | -                                                  |
| <i>Tgfb</i>   | Down (below bkg)                                                          | -                                                  | Up (above bkg)                                     | -                                                  |
| <i>Lbp</i>    | -                                                                         | -                                                  | -                                                  | -                                                  |
| <i>Tlr-2</i>  | -                                                                         | none                                               | -                                                  | -                                                  |
| <i>Tlr13</i>  | -                                                                         | none                                               | none                                               | -                                                  |
| <i>Cd36</i>   | -                                                                         | Down (normalised)                                  | -                                                  | -                                                  |
